# Supplementary material for: Barley Leaf Ameliorates Citrobacter rodentium-Induced Colitis through Preventive Effects
Source: MDPI journal article supplement (doi:10.3390/nu14183833), 2022-09-16
Supplement: s1 [file s1]

## Supplemental file

### **Barley leaf ameliorates *Citrobacter rodentium*-induced colitis mainly through preventive effects**

Yu Feng, Daotong Li, Chen Ma, Meiling Tian, Xiaosong Hu, Fang Chen\*

#### **This file includes:**

Figure S1. Daily food consumption (A) and water intake (B) of each group;

Figure S2. (A) Representative H&E staining images of cecum tissues. Scale bar, 100  $\mu$ m.

(B) Histopathology score of cecal section

Figure S3. Taxonomic distributions of gut bacterial composition at the genus level;

Table S1. The nutritional composition of barley leaf.

Table S2. The macronutrient composition of chow diet (CD) and an isocaloric barley leaf-(BL) supplemented diet.

---

**Correspondence:** College of Food Science and Nutritional Engineering, China Agricultural University, No.17, QinghuaEast Road, Haidian District, Beijing100083, China.

**E-mail:** chenfangch@sina.com; **Tel./Fax:** +86-10-62737654 (ext 18).

## Figure S1

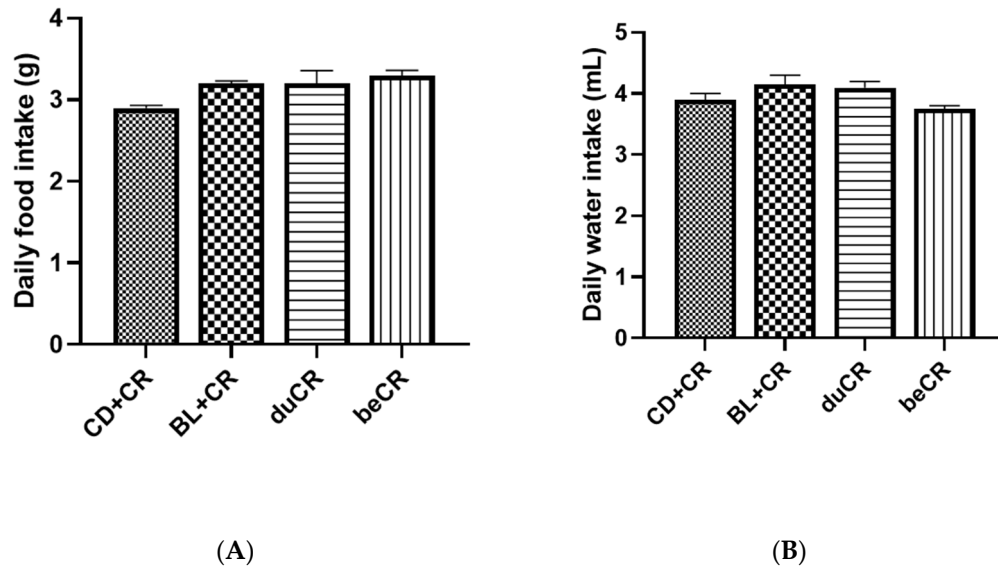

**Figure S1 Daily food consumption (A) and water intake (B) of each group.** Mice were fed with a standard chow diet (CD) or an isocaloric BL-supplemented diet for 3 weeks prior to the infection with *Citrobacter rodentium* (CR) for 10 days. (n = 6 per group). (A) Daily water intake and (B) daily food intake of CD- and BL-fed mice of each group. Data are mean  $\pm$  SEM. a, b means in the same bar without a common letter differ at  $P < 0.05$ .

## Figure S2

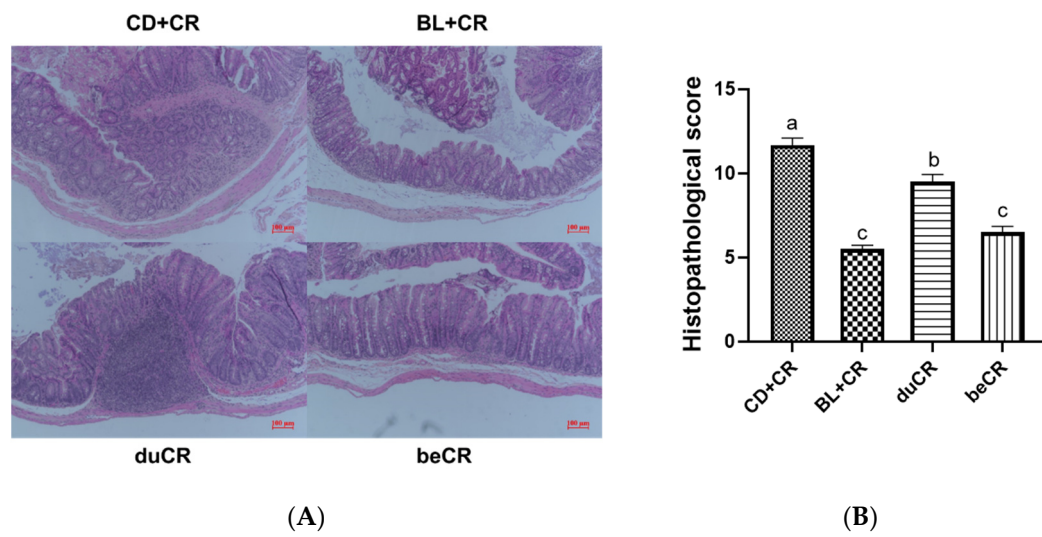

**Figure S2 Effect of the beCR and duCR intervention on improving cecal histopathology.** (A) Representative H&E staining images of cecum tissues. Scale bar, 100 µm. (B) Histopathology score of cecal section; All values are the mean ± SEM, n = 6 if not specified. a, b, c means in the same bar without a common letter differ at  $P < 0.05$ .

Figure S3

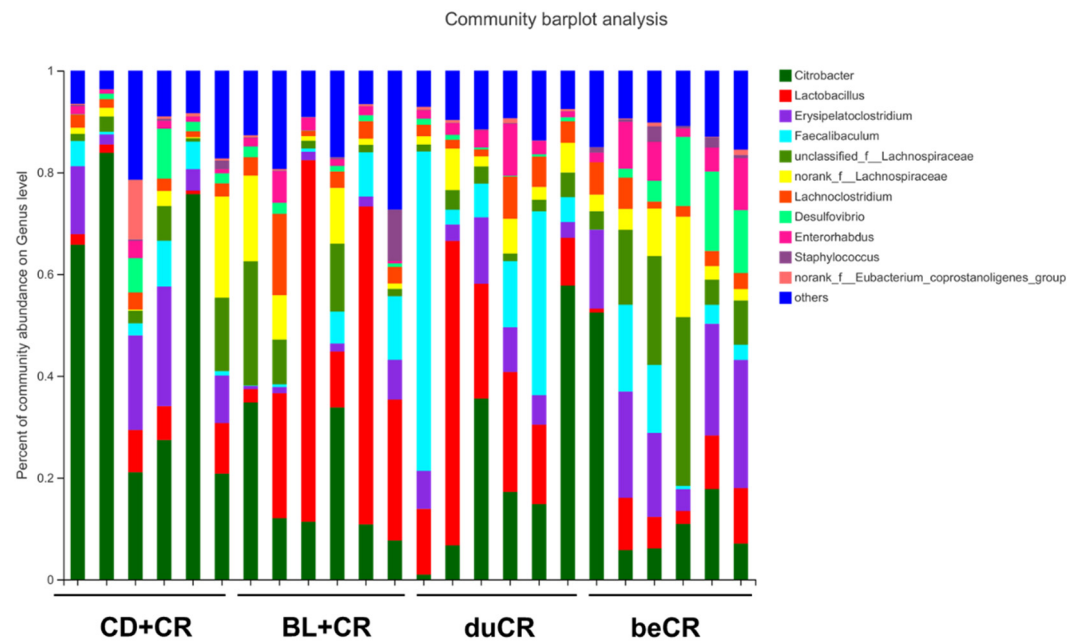

**Figure S3 Effect of beCR and duCR treatment on regulating gut bacterial composition at the genus level.** Each bar represents the taxonomic composition and relative abundance of an individual mouse at the genus level.

# Table S1

**Table S1.** The nutritional composition of barley leaf.

|                         | Unit (g/100g) |
|-------------------------|---------------|
| Protein                 | 23.9          |
| Fat                     | 2.98          |
| Carbohydrate            | 62.3          |
| Soluble dietary fiber   | < 0.01        |
| Insoluble dietary fiber | 53.6          |
| Moisture                | 3.99          |
| Ash                     | 6.8           |

## Table S2

**Table S2.** The macronutrient composition of chow diet (CD) and an isocaloric barley leaf-(BL) supplemented diet.

| Ingredients (g/kg of diet) | Diets  |        |
|----------------------------|--------|--------|
|                            | CD     | BL     |
| BL                         | 0      | 25     |
| Casein                     | 189.58 | 178.58 |
| L-Cysteine                 | 2.84   | 2.84   |
| Corn Starch                | 298.59 | 280.59 |
| Maltodextrin               | 33.18  | 33.18  |
| Sucrose                    | 331.77 | 327.77 |
| Cellulose                  | 47.40  | 47.40  |
| Soybean oil                | 23.70  | 23.70  |
| Lard                       | 18.96  | 18.96  |
| Mineral Mix M1002          | 9.48   | 9.48   |
| DiCalcium Phosphate        | 12.32  | 12.32  |
| Calcium Carbonate          | 5.21   | 5.21   |
| Potassium Citrate          | 15.64  | 15.64  |
| Vitamin mix V10001         | 9.48   | 9.48   |
| Choline Bitartrate         | 1.90   | 1.90   |
| Total                      | 1000   | 1000   |
